# Supplementary material for: Altered Distribution of RNA Polymerase Lacking the Omega Subunit within the Prophages along the Escherichia coli K-12 Genome
Source: PubMed Central journal article supplement (PMC5811629; doi:10.1128/msystems.00172-17), 2018-02-13
Supplement: sys001182181sf1.pdf [file sys001182181sf1.pdf]

## Western blot analysis

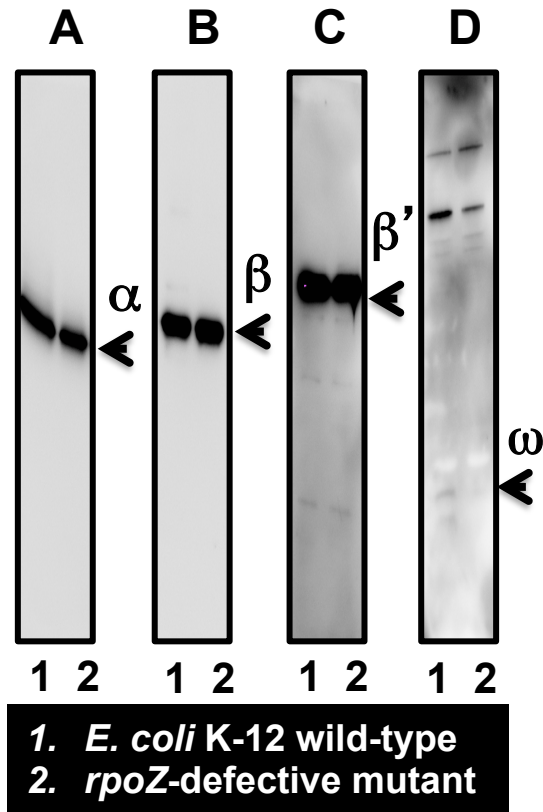

Yamamoto et al. (Fig. S1)
