# Supplementary material for: Altered Distribution of RNA Polymerase Lacking the Omega Subunit within the Prophages along the Escherichia coli K-12 Genome
Source: PubMed Central journal article supplement (PMC5811629; doi:10.1128/msystems.00172-17), 2018-02-13
Supplement: sys001182181sf3.pdf [file sys001182181sf3.pdf]

**A****Tetracycline**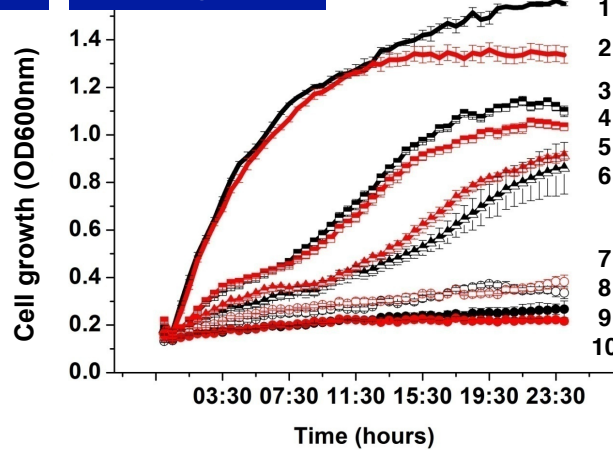

- 1-BW25113 (No Antibiotics)
- 2-JW3624 (No Antibiotics)
- 3-BW25113 (Tetracycline 0.5 µg/ml)
- 4-JW3624 (Tetracycline 0.5 µg/ml)
- 5-BW25113 (Tetracycline 1 µg/ml)
- 6-JW3624 (Tetracycline 1 µg/ml)
- 7-BW25113 (Tetracycline 2 µg/ml)
- 8-JW3624 (Tetracycline 2 µg/ml)
- 9-BW25113 (Tetracycline 4 µg/ml)
- 10-JW3624 (Tetracycline 4 µg/ml)

**B****Penicillin**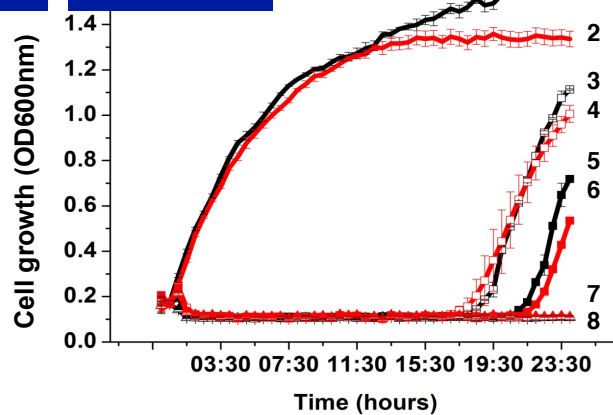

- 1-BW25113 (No Antibiotics)
- 2-JW3624 (No Antibiotics)
- 3-BW25113 (Penicillin 60 µg/ml)
- 4-JW3624 (Penicillin 60 µg/ml)
- 5-BW25113 (Penicillin 90 µg/ml)
- 6-JW3624 (Penicillin 90 µg/ml)
- 7-BW25113 (Penicillin 120 µg/ml)
- 8-JW3624 (Penicillin 120 µg/ml)
