# Supplementary material for: Altered Distribution of RNA Polymerase Lacking the Omega Subunit within the Prophages along the Escherichia coli K-12 Genome
Source: PubMed Central journal article supplement (PMC5811629; doi:10.1128/msystems.00172-17), 2018-02-13
Supplement: sys001182181st1.pdf [file sys001182181st1.pdf]

Supplemental Table S1  
List of Prophages in *Escherichia coli* K-12

1) Genes inside prophages

|               |       |          |           | No. genes |       |       |         |        |    |    |               |                    |
|---------------|-------|----------|-----------|-----------|-------|-------|---------|--------|----|----|---------------|--------------------|
| Prophage      |       | Left end | Right end | Length    | Total | Known | Unknown | Pseudo | TF | IS | Length w/o IS | Insertion site     |
| <b>CP4-6</b>  |       | 262182   | 296489    | 34,308    | 48    | 17    | 26      | 5      | 5  | 8  | 27,332        | <i>thrW</i>        |
| <b>DLP12</b>  | Qsr   | 564025   | 585326    | 21,302    | 36    | 23    | 11      | 2      | 2  | 2  | 18,849        | <i>argU</i>        |
| <b>e14</b>    |       | 1195443  | 1210635   | 15,193    | 22    | 13    | 8       | 1      | 2  | 0  | 15,193        | <i>icd</i>         |
| <b>Rac</b>    |       | 1409923  | 1432982   | 23,060    | 33    | 18    | 12      | 3      | 2  | 1  | 21,865        | <i>ttcA</i>        |
| <b>Qin</b>    | Kim   | 1630310  | 1650767   | 20,458    | 40    | 25    | 13      | 2      |    | 1  | 19,752        | <i>(ydfI-rspB)</i> |
| <b>CP4-44</b> |       | 2065378  | 2077055   | 11,678    | 19    | 6     | 9       | 4      |    | 2  | 9,152         | <i>(insH-yeeX)</i> |
| <b>PR-X</b>   |       | 2165222  | 2165850   | 629       | 2     | 1     | 1       | 0      |    | 0  | 629           | <i>(cyaR-yegR)</i> |
| <b>CPS-53</b> | KpLE1 | 2464407  | 2474621   | 10,215    | 18    | 7     | 10      | 1      |    | 0  | 10,215        | <i>argW</i>        |
| <b>CPZ-55</b> | Eut   | 2556721  | 2563483   | 6,763     | 9     | 1     | 8       | 0      |    | 0  | 6,763         | <i>(eutB-eutA)</i> |
| <b>CP4-57</b> |       | 2753979  | 2776008   | 22,030    | 28    | 4     | 22      | 2      | 2  | 0  | 22,030        | <i>(ssrA-ypjA)</i> |
| <b>KpLE2</b>  |       | 4494108  | 4534178   | 21,302    | 49    | 22    | 21      | 6      | 3  |    | 40,071        |                    |
|               |       |          |           | Total     | 304   | 137   | 141     | 26     | 16 |    |               |                    |

Note: The functions of prophages are mostly predicted based on the sequence similarity to the phage genes.

2) Regulator genes inside prophages

|        |              |                                                                   |
|--------|--------------|-------------------------------------------------------------------|
| Siigma | Known (1)    | <b>FecI</b>                                                       |
| TF     | Known (4)    | <b>AlpA, AppY, DicC, XynR</b>                                     |
| TF     | Unknown (10) | <b>PerR, RacR, SgcR, YagA, YbcM, YdaS, YfjR, Yjhl, YmfN, YmfT</b> |

Note: Regulatory functions have been experimentally identified only for FecI, AppY and XynR
