# Supplementary material for: Altered Distribution of RNA Polymerase Lacking the Omega Subunit within the Prophages along the Escherichia coli K-12 Genome
Source: PubMed Central journal article supplement (PMC5811629; doi:10.1128/msystems.00172-17), 2018-02-13
Supplement: sys001182181st2.pdf [file sys001182181st2.pdf]

**Supplemental Table S2**  
**Sites of Increased distribution of the *rpoZ* mutant RNAP**

| Position | Function                                    | Left          | D | RNAP site     | D | Right          | Function                          | WT   | <i>rpoZ</i>  |
|----------|---------------------------------------------|---------------|---|---------------|---|----------------|-----------------------------------|------|--------------|
| 2070564  | IsrC small RNA                              | <i>isrC</i>   | > | <i>flu</i>    | > | <i>yeeR</i>    | CP4-44 prophage; predicted me     | 0.03 | <b>36.61</b> |
| 2072244  | IsrC small RNA                              | <i>isrC</i>   | > | <i>flu</i>    | > | <i>yeeR</i>    | CP4-44 prophage; predicted me     | 0.07 | <b>13.88</b> |
| 1454964  | acetylacetate degradation protein           | <i>paaD</i>   | > | <i>paaE</i>   | > | <i>paaF</i>    | predicted 2,3-dehydroadipyl-Co    | 0.08 | <b>12.20</b> |
| 1423932  | CP4 prophage; conserved protein             | <i>ynaK</i>   | > | <i>ydaY</i>   | > | Phantom Gene   |                                   | 0.09 | <b>10.88</b> |
| 1465430  | small protein                               | <i>ynbG</i>   | < | <i>ydbA_1</i> | < | <i>insCD-2</i> |                                   | 0.09 | <b>10.68</b> |
| 587048   | EnvY transcriptional activator              | <i>envY</i>   | < | <i>ybcH</i>   | < | <i>nfrA</i>    | bacteriophage N4 receptor, out    | 0.09 | <b>10.56</b> |
| 1601540  | LsrA                                        | <i>lsrA</i>   | > | <i>lsrC</i>   | > | <i>lsrD</i>    | LsrD                              | 0.11 | <b>9.45</b>  |
| 1196070  | C0293 small RNA                             | <i>C0293</i>  | > |               | < | <i>yfmD</i>    | e14 prophage; predicted SAM-d     | 0.11 | <b>9.44</b>  |
| 1204068  | e14 prophage; predicted protein             | <i>yfmM</i>   | > | <i>yfmN</i>   | > | <i>yfmR</i>    | e14 prophage; predicted protein   | 0.11 | <b>9.19</b>  |
| 1206850  | e14 prophage; conserved protein             | <i>yfmQ</i>   | > | <i>ycfK</i>   | > | <i>yfmS</i>    | e14 prophage; predicted protein   | 0.11 | <b>9.16</b>  |
| 2312572  | regulator of OmpF abundance                 | <i>micF</i>   | > | <i>rcsD</i>   | > | <i>rcsB</i>    | RcsB                              | 0.11 | <b>9.11</b>  |
| 1201958  | e14 prophage; predicted protein             | <i>yfmJ</i>   | < | <i>yfmK</i>   | > | <i>yfmT</i>    | e14 prophage; predicted DNA-t     | 0.11 | <b>9.07</b>  |
| 262270   | tRNA<SUP>thrW</SUP>                         | <i>thrW</i>   | > |               | < | <i>ykfl</i>    | toxin of the Ykfl-YafW toxin-anti | 0.11 | <b>8.98</b>  |
| 1203856  | e14 prophage; predicted protein             | <i>yfmM</i>   | > | <i>yfmN</i>   | > | <i>yfmR</i>    | e14 prophage; predicted protein   | 0.12 | <b>8.61</b>  |
| 1600072  | LsrR transcriptional repressor              | <i>lsrR</i>   | < | <i>lsrA</i>   | > | <i>lsrC</i>    | LsrC                              | 0.12 | <b>8.47</b>  |
| 1465240  | small protein                               | <i>ynbG</i>   | < | <i>ydbA_1</i> | < | <i>insCD-2</i> |                                   | 0.13 | <b>7.83</b>  |
| 1203654  | e14 prophage; predicted protein             | <i>yfmM</i>   | > | <i>yfmN</i>   | > | <i>yfmR</i>    | e14 prophage; predicted protein   | 0.13 | <b>7.79</b>  |
| 589072   | predicted protein                           | <i>ybcH</i>   | < | <i>nfrA</i>   | < | <i>nfrB</i>    | bacteriophage N4 receptor, inne   | 0.14 | <b>7.38</b>  |
| 1203134  | binding transcriptional regulator           | <i>yfmL</i>   | > | <i>yfmM</i>   | > | <i>yfmN</i>    | e14 prophage; predicted DNA-t     | 0.14 | <b>7.31</b>  |
| 1204672  | e14 prophage; predicted protein             | <i>yfmM</i>   | > | <i>yfmN</i>   | > | <i>yfmR</i>    | e14 prophage; predicted protein   | 0.14 | <b>7.24</b>  |
| 2877772  | predicted integrase                         | <i>cas1</i>   | < |               | < | <i>casE</i>    | crRNA endonuclease                | 0.14 | <b>7.18</b>  |
| 1201570  | e14 prophage; predicted protein             | <i>yfmJ</i>   | < | <i>yfmK</i>   | > | <i>yfmT</i>    | e14 prophage; predicted DNA-t     | 0.14 | <b>7.14</b>  |
| 587130   | EnvY transcriptional activator              | <i>envY</i>   | < | <i>ybcH</i>   | < | <i>nfrA</i>    | bacteriophage N4 receptor, out    | 0.14 | <b>7.09</b>  |
| 797342   | ModC                                        | <i>modC</i>   | > | <i>ybhA</i>   | > | <i>pgl</i>     | 6-phosphogluconolactonase         | 0.14 | <b>7.06</b>  |
| 789534   | galactokinase                               | <i>galK</i>   | < | <i>galT</i>   | < | <i>galE</i>    | UDP-glucose 4-epimerase mon       | 0.14 | <b>7.03</b>  |
| 3361232  | periplasmic chaperone protein               | <i>yhcA</i>   | > | <i>yhcD</i>   | > | <i>yche_1</i>  | predicted protein, N-ter fragmen  | 0.14 | <b>7.00</b>  |
| 1202030  | e14 prophage; predicted protein             | <i>yfmJ</i>   | < | <i>yfmK</i>   | > | <i>yfmT</i>    | e14 prophage; predicted DNA-t     | 0.14 | <b>6.96</b>  |
| 4522660  | element; predicted dehydratase              | <i>yjhG</i>   | < | <i>yjhH</i>   | < | <i>yjhI</i>    | KpLE2 phage-like element; pre     | 0.15 | <b>6.88</b>  |
| 587256   | predicted protein                           | <i>ybcH</i>   | < | <i>nfrA</i>   | < | <i>nfrB</i>    | bacteriophage N4 receptor, inne   | 0.15 | <b>6.88</b>  |
| 1425368  | Phantom Gene                                |               | > | <i>ynaA</i>   | > | <i>lomR_1</i>  | Rac prophage; predicted protein   | 0.15 | <b>6.82</b>  |
| 2071650  | IsrC small RNA                              | <i>isrC</i>   | > | <i>flu</i>    | > | <i>yeeR</i>    | CP4-44 prophage; predicted me     | 0.15 | <b>6.76</b>  |
| 1197950  | predicted inner membrane protein            | <i>yfmE</i>   | < | <i>lit</i>    | < | <i>intE</i>    | e14 prophage; predicted integra   | 0.15 | <b>6.75</b>  |
| 1600368  | LsrR transcriptional repressor              | <i>lsrR</i>   | < | <i>lsrA</i>   | > | <i>lsrC</i>    | LsrC                              | 0.15 | <b>6.69</b>  |
| 1429466  | predicted protein, C-ter fragment           | <i>lomR_2</i> | > | <i>stfR</i>   | > | <i>tfaR</i>    | Rac prophage; predicted tail fib  | 0.15 | <b>6.65</b>  |
| 1601656  | LsrA                                        | <i>lsrA</i>   | > | <i>lsrC</i>   | > | <i>lsrD</i>    | LsrD                              | 0.15 | <b>6.59</b>  |
| 1420040  | CP4 prophage; conserved protein             | <i>ydaU</i>   | > | <i>ydaV</i>   | > | <i>ydaW</i>    | Rac prophage; predicted DNA-t     | 0.15 | <b>6.58</b>  |
| 590934   | receptor, outer membrane protein            | <i>nfrA</i>   | < | <i>nfrB</i>   | < | <i>cusS</i>    | CusS                              | 0.15 | <b>6.55</b>  |
| 1209732  | site-specific DNA recombinase               | <i>pinE</i>   | > | <i>mcrA</i>   | > | <i>icdC</i>    | conserved protein                 | 0.16 | <b>6.41</b>  |
| 4330870  | ProP                                        | <i>proP</i>   | > | <i>basS</i>   | < | <i>basR</i>    | BasR transcriptional regulator    | 0.16 | <b>6.41</b>  |
| 1601444  | LsrA                                        | <i>lsrA</i>   | > | <i>lsrC</i>   | > | <i>lsrD</i>    | LsrD                              | 0.16 | <b>6.28</b>  |
| 792438   | glucose 4-epimerase monomer                 | <i>galE</i>   | < | <i>modF</i>   | < | <i>modE</i>    | ModE                              | 0.16 | <b>6.27</b>  |
| 1418472  | binding transcriptional regulator           | <i>racR</i>   | < | <i>ydaS</i>   | > | <i>ydaT</i>    | Rac prophage; predicted protein   | 0.16 | <b>6.26</b>  |
| 1730972  | Rnt                                         | <i>rnt</i>    | > | <i>lhr</i>    | < | <i>grxD</i>    | glutaredoxin 4                    | 0.16 | <b>6.26</b>  |
| 1471542  | transposase of IS30                         | <i>insI-2</i> | > | <i>ydbA_2</i> | > | <i>ydbC</i>    | predicted oxidoreductase, NAD     | 0.16 | <b>6.17</b>  |
| 1200944  | e14 prophage; predicted protein             | <i>yfmH</i>   | < | <i>yfmI</i>   | < | <i>yfmJ</i>    | e14 prophage; predicted protein   | 0.16 | <b>6.16</b>  |
| 4522072  | YjhF Gnt transporter                        | <i>yjhF</i>   | < | <i>yjhG</i>   | < | <i>yjhH</i>    | predicted lyase/synthase          | 0.16 | <b>6.12</b>  |
| 1600146  | LsrR transcriptional repressor              | <i>lsrR</i>   | < | <i>lsrA</i>   | > | <i>lsrC</i>    | LsrC                              | 0.16 | <b>6.12</b>  |
| 2766158  | e57 prophage; predicted protein             | <i>yfjO</i>   | > | <i>yfjP</i>   | > | <i>yfjQ</i>    | CP4-57 prophage; predicted pr     | 0.16 | <b>6.10</b>  |
| 157546   | teichoic acid fimbrial-like adhesin protein | <i>yadN</i>   | < | <i>folK</i>   | < | <i>pcnB</i>    | poly(A) polymerase I              | 0.17 | <b>6.05</b>  |
| 382950   | predicted protein                           | <i>yaiF</i>   | < | <i>yaiP</i>   | < | <i>yaiS</i>    | conserved protein                 | 0.17 | <b>6.03</b>  |
| 1455532  | acetyl-CoA epoxidase subunit                | <i>paaE</i>   | > |               | > | <i>paaF</i>    | predicted 2,3-dehydroadipyl-Co    | 0.17 | <b>5.94</b>  |

|         |                                   |               |   |               |   |                    |                                  |      |             |
|---------|-----------------------------------|---------------|---|---------------|---|--------------------|----------------------------------|------|-------------|
| 2070054 | IsrC small RNA                    | <i>isrC</i>   | > | <i>flu</i>    | > | <i>yeeR</i>        | CP4-44 prophage; predicted me    | 0.17 | <b>5.92</b> |
| 1465342 | small protein                     | <i>ynbG</i>   | < | <i>ydbA_1</i> | < | <i>insCD-2</i>     |                                  | 0.17 | <b>5.90</b> |
| 1453732 | ylacetyl-CoA epoxidase subunit    | <i>paaB</i>   | > | <i>paaC</i>   | > | <i>paaD</i>        | phenylacetate degradation prot   | 0.17 | <b>5.78</b> |
| 1599758 | LsrR transcriptional repressor    | <i>lsrR</i>   | < | <i>lsrA</i>   | > | <i>lsrC</i>        | LsrC                             | 0.17 | <b>5.73</b> |
| 1456072 | ylacetyl-CoA epoxidase subunit    | <i>paaE</i>   | > | <i>paaF</i>   | > | <i>paaG</i>        | predicted ring 1,2-epoxyphenyl   | 0.17 | <b>5.73</b> |
| 2074950 | e; predicted DNA repair protein   | <i>yeeS</i>   | > | <i>yeeT</i>   | > | <i>yeeU</i>        | CP4-44 prophage; antitoxin of t  | 0.18 | <b>5.71</b> |
| 4572470 | conserved protein                 | <i>yjiT</i>   | > | <i>yjiV</i>   | < | <i>mcrC</i>        | MrcC subunit of 5-methylcytosin  | 0.18 | <b>5.63</b> |
| 794844  | cell envelope stress response     | <i>ybhT</i>   | > | <i>modA</i>   | > | <i>modB</i>        | ModB                             | 0.18 | <b>5.61</b> |
| 1456272 | 3-dehydroadipyl-CoA hydratase     | <i>paaF</i>   | > |               | > | <i>paaG</i>        | predicted ring 1,2-epoxyphenyl   | 0.18 | <b>5.60</b> |
| 803372  | YbhI DASS Transporter             | <i>ybhI</i>   | > | <i>ybhJ</i>   | < | <i>ybhC</i>        | outer membrane lipoprotein       | 0.18 | <b>5.58</b> |
| 1202338 | age; predicted repressor protein  | <i>ymfK</i>   | < | <i>ymfT</i>   | > | <i>ymfL</i>        | e14 prophage; predicted DNA-t    | 0.18 | <b>5.57</b> |
| 4522130 | element; predicted dehydratase    | <i>yjhG</i>   | < |               | < | <i>yjhH</i>        | predicted lyase/synthase         | 0.18 | <b>5.54</b> |
| 1205158 | e14 prophage; predicted protein   | <i>ymfR</i>   | > | <i>ymfO</i>   | > | <i>ymfP</i>        | e14 prophage; conserved prote    | 0.18 | <b>5.48</b> |
| 2792144 | ate aminotransferase monomer      | <i>gabT</i>   | > |               | > | <i>gabP</i>        | GabP APC transporter             | 0.18 | <b>5.46</b> |
| 1455370 | enylacetate degradation protein   | <i>paaD</i>   | > | <i>paaE</i>   | > | <i>paaF</i>        | predicted 2,3-dehydroadipyl-Co   | 0.18 | <b>5.44</b> |
| 1465542 | small protein                     | <i>ynbG</i>   | < | <i>ydbA_1</i> | < | <i>insCD-2</i>     |                                  | 0.18 | <b>5.43</b> |
| 383064  | predicted protein                 | <i>yaiF</i>   | < | <i>yaiP</i>   | < | <i>yaiS</i>        | conserved protein                | 0.18 | <b>5.43</b> |
| 762354  | SucB                              | <i>sucB</i>   | > | <i>sucC</i>   | > | <i>sucD</i>        | succinyl-CoA synthetase, &alph   | 0.18 | <b>5.41</b> |
| 1199130 | phage exclusion; e14 prophage     | <i>lit</i>    | > | <i>intE</i>   | < | <i>xisE</i>        | e14 prophage; predicted excisid  | 0.19 | <b>5.38</b> |
| 269370  | ; predicted GTP-binding protein   | <i>ykfA</i>   | < | <i>perR</i>   | > | <i>insN-1</i>      | CP4-6 prophage; partial regulat  | 0.19 | <b>5.33</b> |
| 265342  | 4-6 prophage; predicted protein   | <i>ykfB</i>   | < |               | < | <i>yafY</i>        | CP4-6 prophage; inner membra     | 0.19 | <b>5.30</b> |
| 795956  | ModB                              | <i>modB</i>   | > | <i>modC</i>   | < | <i>ybhA</i>        | pyridoxal phosphatase/fructose   | 0.19 | <b>5.24</b> |
| 1601048 | LsrA                              | <i>lsrA</i>   | > |               | > | <i>lsrC</i>        | LsrC                             | 0.19 | <b>5.24</b> |
| 263962  | e; predicted DNA repair protein   | <i>ykfG</i>   | < |               | < | <i>yafX</i>        | CP4-6 prophage; predicted prot   | 0.19 | <b>5.23</b> |
| 1456552 | 3-dehydroadipyl-CoA hydratase     | <i>paaF</i>   | > | <i>paaG</i>   | > | <i>paaH</i>        | 3-hydroxyadipyl-CoA dehydroge    | 0.19 | <b>5.22</b> |
| 1455966 | ylacetyl-CoA epoxidase subunit    | <i>paaE</i>   | > | <i>paaF</i>   | > | <i>paaG</i>        | predicted ring 1,2-epoxyphenyl   | 0.19 | <b>5.19</b> |
| 132632  | putative membrane protein         | <i>yachH</i>  | < | <i>acnB</i>   | > | <i>yacL</i>        | conserved protein                | 0.19 | <b>5.16</b> |
| 2429734 | cell division protein DedD        | <i>dedD</i>   | < | <i>folC</i>   | < | <i>accD</i>        | acetyl-CoA carboxyltransferase   | 0.19 | <b>5.16</b> |
| 1197150 | M-dependent methyltransferase     | <i>ymfD</i>   | < | <i>ymfE</i>   | > | <i>lit</i>         | Lit, cell death peptidase; phage | 0.20 | <b>5.12</b> |
| 2767172 | ; predicted GTP-binding protein   | <i>yfjP</i>   | > | <i>yfjQ</i>   | > | <i>yfjR</i>        | CP4-57 prophage; predicted DF    | 0.20 | <b>5.10</b> |
| 2069568 | IsrC small RNA                    | <i>isrC</i>   | > |               | > | <i>flu</i>         | CP4-44 prophage; antigen 43 (    | 0.20 | <b>5.08</b> |
| 271644  | ed by insertion of IS30 element   | <i>insO-1</i> | > |               | > | <i>ykfC</i>        | CP4-6 prophage; conserved pr     | 0.20 | <b>5.06</b> |
| 797972  | se/fructose 1,6-bisphosphatase    | <i>ybhA</i>   | < | <i>pgl</i>    | < | <i>ybhD</i>        | predicted DNA-binding transcrip  | 0.20 | <b>5.06</b> |
| 803452  | YbhI DASS Transporter             | <i>ybhI</i>   | > | <i>ybhJ</i>   | < | <i>ybhC</i>        | outer membrane lipoprotein       | 0.20 | <b>5.05</b> |
| 790246  | 1-phosphate uridylyltransferase   | <i>galT</i>   | < |               | < | <i>galE</i>        | UDP-glucose 4-epimerase mon      | 0.20 | <b>5.04</b> |
| 1201266 | e14 prophage; predicted protein   | <i>ymfI</i>   | > | <i>ymfJ</i>   | < | <i>ymfK</i>        | e14 prophage; predicted repres   | 0.20 | <b>5.03</b> |
| 1461158 | &beta;-keto adipyl-CoA thiolase   | <i>paaJ</i>   | > | <i>paaK</i>   | > | <i>paaX</i>        | PaaX                             | 0.20 | <b>5.00</b> |
| 1203942 | e14 prophage; predicted protein   | <i>ymfM</i>   | > | <i>ymfN</i>   | > | <i>ymfR</i>        | e14 prophage; predicted proteir  | 0.20 | <b>4.96</b> |
| 1204338 | e14 prophage; predicted protein   | <i>ymfM</i>   | > | <i>ymfN</i>   | > | <i>ymfR</i>        | e14 prophage; predicted proteir  | 0.20 | <b>4.96</b> |
| 796262  | ModB                              | <i>modB</i>   | > | <i>modC</i>   | < | <i>ybhA</i>        | pyridoxal phosphatase/fructose   | 0.20 | <b>4.94</b> |
| 1205436 | e14 prophage; conserved protein   | <i>ymfO</i>   | > |               | > | <i>ymfP</i>        | e14 prophage; conserved prote    | 0.20 | <b>4.92</b> |
| 272152  | ed by insertion of IS30 element   | <i>insO-1</i> | > | <i>ykfC</i>   | < | <i>insH-1</i>      | IS5 transposase and trans-activ  | 0.20 | <b>4.92</b> |
| 1423850 | ac prophage; conserved protein    | <i>ynaK</i>   | > | <i>ydaY</i>   | > | <i>hantom Gene</i> |                                  | 0.20 | <b>4.89</b> |
| 1420636 | ac prophage; conserved protein    | <i>ydaU</i>   | > | <i>ydaV</i>   | > | <i>ydaW</i>        | Rac prophage; predicted DNA-t    | 0.20 | <b>4.88</b> |
| 2995732 |                                   | <i>insC-4</i> | < |               | < | <i>ygeP</i>        | predicted protein                | 0.21 | <b>4.84</b> |
| 679334  | erved outer membrane protein      | <i>ybeT</i>   | < | <i>ybeU</i>   | > | <i>djIC</i>        | Hsc56, co-chaperone of Hsc62     | 0.21 | <b>4.84</b> |
| 382470  | predicted protein                 | <i>yaiF</i>   | < | <i>yaiP</i>   | < | <i>yaiS</i>        | conserved protein                | 0.21 | <b>4.84</b> |
| 2560934 | 55 prophage; predicted protein    | <i>yffO</i>   | > | <i>yffP</i>   | > | <i>yffQ</i>        | CPZ-55 prophage; predicted pr    | 0.21 | <b>4.82</b> |
| 589344  | predicted protein                 | <i>ybcH</i>   | < | <i>nfrA</i>   | < | <i>nfrB</i>        | bacteriophage N4 receptor, inn   | 0.21 | <b>4.78</b> |
| 1455740 | ylacetyl-CoA epoxidase subunit    | <i>paaE</i>   | > | <i>paaF</i>   | > | <i>paaG</i>        | predicted ring 1,2-epoxyphenyl   | 0.21 | <b>4.77</b> |
| 2767948 | 57 prophage; predicted protein    | <i>yfjQ</i>   | > | <i>yfjR</i>   | > | <i>ypjK</i>        | CP4-57 prophage; predicted inf   | 0.21 | <b>4.77</b> |
| 262534  | tRNA<SUP>thrW</SUP>               | <i>thrW</i>   | > |               | < | <i>ykfl</i>        | toxin of the Ykfl-YafW toxin-ant | 0.21 | <b>4.75</b> |
| 1202662 | binding transcriptional regulator | <i>ymfT</i>   | > | <i>ymfL</i>   | > | <i>ymfM</i>        | e14 prophage; predicted proteir  | 0.21 | <b>4.74</b> |
| 383868  | conserved protein                 | <i>yaiS</i>   | < |               | > | <i>tauA</i>        | TauA                             | 0.21 | <b>4.74</b> |

|         |                                  |                 |   |               |             |                                   |                                    |             |             |
|---------|----------------------------------|-----------------|---|---------------|-------------|-----------------------------------|------------------------------------|-------------|-------------|
| 1200254 | rophage; predicted excisionase   | <i>xisE</i>     | < | <             | <i>ymfH</i> | e14 prophage; predicted protein   | 0.21                               | <b>4.73</b> |             |
| 1197732 | redicted inner membrane protein  | <i>ymfE</i>     | < | >             | <i>lit</i>  | Lit, cell death peptidase; phage  | 0.21                               | <b>4.73</b> |             |
| 1206454 | 4 prophage; conserved protein    | <i>ymfP</i>     | > | <i>ymfQ</i>   | >           | <i>ycfK</i>                       | e14 prophage; predicted protein    | 0.21        | <b>4.73</b> |
| 1471442 | transposase of IS30              | <i>insI-2</i>   | > | <i>ydbA_2</i> | >           | <i>ydbC</i>                       | predicted oxidoreductase, NAD      | 0.21        | <b>4.72</b> |
| 2768670 | inding transcriptional regulator | <i>yfjR</i>     | > | <i>ypjK</i>   | >           | <i>yfjS</i>                       | CP4-57 prophage; inner memb        | 0.21        | <b>4.71</b> |
| 1598340 | autoinducer-2 kinase             | <i>lsrK</i>     | < | <             | <i>lsrR</i> | LsrR transcriptional repressor    | 0.21                               | <b>4.70</b> |             |
| 4522530 | element; predicted dehydratase   | <i>yjhG</i>     | < | <i>yjhH</i>   | <           | <i>yjhI</i>                       | KpLE2 phage-like element; pre      | 0.21        | <b>4.67</b> |
| 4522266 | element; predicted dehydratase   | <i>yjhG</i>     | < | <i>yjhH</i>   | <           | <i>yjhI</i>                       | KpLE2 phage-like element; pre      | 0.21        | <b>4.67</b> |
| 4569338 | predicted transposase            | <i>yjiQ</i>     | > | <i>yjiR</i>   | >           | <i>yjiS</i>                       | conserved protein                  | 0.22        | <b>4.64</b> |
| 2072072 | IsrC small RNA                   | <i>isrC</i>     | > | <i>flu</i>    | >           | <i>yeeR</i>                       | CP4-44 prophage; predicted me      | 0.22        | <b>4.64</b> |
| 1450164 | TynA                             | <i>tynA</i>     | < | <i>paaZ</i>   | >           | <i>paaA</i>                       | predicted ring 1,2-phenylacetyl-   | 0.22        | <b>4.63</b> |
| 2076030 | eV-YeeU toxin-antitoxin system   | <i>yeeV</i>     | > | <i>yeeW</i>   | >           | <i>yoeF</i>                       | conserved protein                  | 0.22        | <b>4.59</b> |
| 1454158 | ylacetyl-CoA epoxidase subunit   | <i>paaC</i>     | > | <i>paaD</i>   | >           | <i>paaE</i>                       | predicted ring 1,2-phenylacetyl-   | 0.22        | <b>4.59</b> |
| 287630  | putative &beta;-xylosidase       | <i>yagH</i>     | > | <             | <i>yagl</i> | CP4-6 prophage; predicted DN      | 0.22                               | <b>4.57</b> |             |
| 268354  | redicted GTP-binding protein     | <i>ykfA</i>     | < | <             | <i>perR</i> | PerR transcriptional regulator    | 0.22                               | <b>4.56</b> |             |
| 1428734 | redicted protein, C-ter fragment | <i>lomR_2</i>   | > | <i>stfR</i>   | >           | <i>tfaR</i>                       | Rac prophage; predicted tail fib   | 0.22        | <b>4.55</b> |
| 792358  | glucose 4-epimerase monomer      | <i>galE</i>     | < | <i>modF</i>   | <           | <i>modE</i>                       | ModE                               | 0.22        | <b>4.55</b> |
| 800930  | inding transcriptional regulator | <i>ybhD</i>     | < | <i>ybhH</i>   | >           | <i>ybhI</i>                       | YbhI DASS Transporter              | 0.22        | <b>4.54</b> |
| 2473052 | E1) prophage; predicted protein  | <i>yfdQ</i>     | > | <i>yfdR</i>   | >           | <i>yfdS</i>                       | CPS-53 (KpLE1) prophage; pre       | 0.22        | <b>4.53</b> |
| 272358  | ed by insertion of IS30 element  | <i>insO-1</i>   | > | <i>ykfC</i>   | <           | <i>insH-1</i>                     | IS5 transposase and trans-activ    | 0.22        | <b>4.50</b> |
| 1458754 | rogenase (NAD <sup>+</sup> )     | <i>paaH</i>     | > | <i>paal</i>   | >           | <i>paaJ</i>                       | &beta;-ketoacyl-CoA thiolase       | 0.22        | <b>4.47</b> |
| 592370  | ceptor, outer membrane protein   | <i>nfrA</i>     | < | <i>nfrB</i>   | <           | <i>cusS</i>                       | CusS                               | 0.22        | <b>4.45</b> |
| 4517736 |                                  | <i>insB-7_2</i> | > | <i>yjhU</i>   | <           | <i>yjhF</i>                       | YjhF Gnt transporter               | 0.23        | <b>4.43</b> |
| 1600932 | LsrR transcriptional repressor   | <i>lsrR</i>     | < | <i>lsrA</i>   | >           | <i>lsrC</i>                       | LsrC                               | 0.23        | <b>4.43</b> |
| 1454370 | ylacetyl-CoA epoxidase subunit   | <i>paaC</i>     | > | <i>paaD</i>   | >           | <i>paaE</i>                       | predicted ring 1,2-phenylacetyl-   | 0.23        | <b>4.42</b> |
| 940230  | seryl-tRNA synthetase            | <i>serS</i>     | > | <i>dmsA</i>   | >           | <i>dmsB</i>                       | dimethyl sulfoxide reductase, cl   | 0.23        | <b>4.40</b> |
| 2312436 | regulator of OmpF abundance      | <i>micF</i>     | > | <i>rcsD</i>   | >           | <i>rcsB</i>                       | RcsB                               | 0.23        | <b>4.39</b> |
| 2848130 | hydrogenase 3, Fe-S subunit      | <i>hycB</i>     | < | <i>hycA</i>   | >           | <i>hypA</i>                       | accessory protein for nickel inc   | 0.23        | <b>4.39</b> |
| 2070640 | IsrC small RNA                   | <i>isrC</i>     | > | <i>flu</i>    | >           | <i>yeeR</i>                       | CP4-44 prophage; predicted me      | 0.23        | <b>4.38</b> |
| 795332  | ModA                             | <i>modA</i>     | > | <i>modB</i>   | >           | <i>modC</i>                       | ModC                               | 0.23        | <b>4.36</b> |
| 797654  | se/fructose 1,6-bisphosphatase   | <i>ybhA</i>     | < | >             | <i>pgl</i>  | 6-phosphogluconolactonase         | 0.23                               | <b>4.35</b> |             |
| 793560  | ModF                             | <i>modF</i>     | < | <i>modE</i>   | >           | <i>ybhT</i>                       | small membrane protein involve     | 0.23        | <b>4.34</b> |
| 1196168 | C0293 small RNA                  | <i>C0293</i>    | > | <i>ymfD</i>   | <           | <i>ymfE</i>                       | e14 prophage; predicted inner r    | 0.23        | <b>4.33</b> |
| 1459732 | phenylacetyl-CoA thioesterase    | <i>paal</i>     | > | <i>paaJ</i>   | >           | <i>paaK</i>                       | phenylacetate-CoA ligase           | 0.23        | <b>4.32</b> |
| 2933440 |                                  | <i>fucA</i>     | < | <i>fucP</i>   | >           | <i>fucI</i>                       |                                    | 0.23        | <b>4.32</b> |
| 2068966 | hypothetical protein             | <i>yoeE</i>     | > | <i>yeeP</i>   | >           | <i>isrC</i>                       | IsrC small RNA                     | 0.23        | <b>4.30</b> |
| 1209632 | site-specific DNA recombinase    | <i>pinE</i>     | > | <i>mcrA</i>   | >           | <i>icdC</i>                       | conserved protein                  | 0.23        | <b>4.29</b> |
| 272534  | ed by insertion of IS30 element  | <i>insO-1</i>   | > | <i>ykfC</i>   | <           | <i>insH-1</i>                     | IS5 transposase and trans-activ    | 0.23        | <b>4.27</b> |
| 1200160 | rophage; predicted integrase     | <i>intE</i>     | < | <i>xisE</i>   | <           | <i>ymfH</i>                       | e14 prophage; predicted protein    | 0.23        | <b>4.27</b> |
| 262764  | tRNA <sup>thrW</sup>             | <i>thrW</i>     | > | <i>ykfl</i>   | <           | <i>yafW</i>                       | antitoxin of the Ykfl-YafW toxin-  | 0.23        | <b>4.26</b> |
| 2762334 | 57 prophage; conserved protein   | <i>yfjK</i>     | < | <i>yfjL</i>   | <           | <i>yfjM</i>                       | CP4-57 prophage; predicted pr      | 0.24        | <b>4.24</b> |
| 795838  | ModB                             | <i>modB</i>     | > | <i>modC</i>   | <           | <i>ybhA</i>                       | pyridoxal phosphatase/fructose     | 0.24        | <b>4.24</b> |
| 1428632 | redicted protein, C-ter fragment | <i>lomR_2</i>   | > | <i>stfR</i>   | >           | <i>tfaR</i>                       | Rac prophage; predicted tail fib   | 0.24        | <b>4.23</b> |
| 1598262 | autoinducer-2 kinase             | <i>lsrK</i>     | < | <             | <i>lsrR</i> | LsrR transcriptional repressor    | 0.24                               | <b>4.22</b> |             |
| 3642234 | M-dependent methyltransferase    | <i>yhiQ</i>     | < | <i>prlC</i>   | >           | <i>yhiR</i>                       | protein involved in utilization of | 0.24        | <b>4.21</b> |
| 2072336 | IsrC small RNA                   | <i>isrC</i>     | > | <i>flu</i>    | >           | <i>yeeR</i>                       | CP4-44 prophage; predicted me      | 0.24        | <b>4.21</b> |
| 287038  | YagG GPH Transporter             | <i>yagG</i>     | > | <i>yagH</i>   | <           | <i>yagl</i>                       | CP4-6 prophage; predicted DN       | 0.24        | <b>4.20</b> |
| 2592530 | esterase                         | <i>ypfH</i>     | < | <i>tmcA</i>   | <           | <i>ypfJ</i>                       | conserved protein                  | 0.24        | <b>4.20</b> |
| 1206970 | 4 prophage; conserved protein    | <i>ymfQ</i>     | > | <i>ycfK</i>   | >           | <i>ymfS</i>                       | e14 prophage; predicted protein    | 0.24        | <b>4.19</b> |
| 789930  | galactokinase                    | <i>galK</i>     | < | <i>galT</i>   | <           | <i>galE</i>                       | UDP-glucose 4-epimerase mon        | 0.24        | <b>4.18</b> |
| 788562  | galactose-1-epimerase            | <i>galM</i>     | < | <i>galK</i>   | <           | <i>galT</i>                       | galactose-1-phosphate uridylylt    | 0.24        | <b>4.17</b> |
| 1967156 | CheB                             | <i>cheB</i>     | < | <i>cheR</i>   | <           | <i>tap</i>                        | Tap                                | 0.24        | <b>4.16</b> |
| 2522850 | pB xanthosine MFS transporter    | <i>xapB</i>     | < | <i>xapA</i>   | >           | <i>yfeN</i>                       | conserved outer membrane pro       | 0.24        | <b>4.15</b> |
| 262434  | tRNA <sup>thrW</sup>             | <i>thrW</i>     | > | <             | <i>ykfl</i> | toxin of the Ykfl-YafW toxin-anti | 0.24                               | <b>4.14</b> |             |

|         |                                        |               |   |               |   |                |                                        |      |             |
|---------|----------------------------------------|---------------|---|---------------|---|----------------|----------------------------------------|------|-------------|
| 1414360 | recombinase, DNA renaturation          | <i>recT</i>   | < | <i>recE</i>   | < | <i>racC</i>    | Rac prophage; predicted protein        | 0.24 | <b>4.13</b> |
| 4569036 | predicted transposase                  | <i>yjiQ</i>   | > | <i>yjiR</i>   | > | <i>yjiS</i>    | conserved protein                      | 0.24 | <b>4.12</b> |
| 1602248 | LsrC                                   | <i>lsrC</i>   | > | <i>lsrD</i>   | > | <i>lsrB</i>    | LsrB                                   | 0.24 | <b>4.12</b> |
| 796568  | ModB                                   | <i>modB</i>   | > | <i>modC</i>   | < | <i>ybhA</i>    | pyridoxal phosphatase/fructose         | 0.24 | <b>4.10</b> |
| 274956  | transposase and trans-activator        | <i>insH-1</i> | < | <i>mmuP</i>   | > | <i>mmuM</i>    | homocysteine methyltransferase         | 0.24 | <b>4.10</b> |
| 589844  | predicted protein                      | <i>ybcH</i>   | < | <i>nfrA</i>   | < | <i>nfrB</i>    | bacteriophage N4 receptor, inner       | 0.24 | <b>4.10</b> |
| 2312230 | regulator of OmpF abundance            | <i>micF</i>   | > | <i>rscD</i>   | > | <i>rscB</i>    | RcsB                                   | 0.24 | <b>4.10</b> |
| 109870  | in (General Secretory Pathway)         | <i>secM</i>   | > | <i>secA</i>   | > | <i>mutT</i>    | dGTP pyrophosphohydrolase              | 0.24 | <b>4.08</b> |
| 1453334 | phenylacetyl-CoA epoxidase subunit     | <i>paaB</i>   | > | <i>paaC</i>   | > | <i>paaD</i>    | phenylacetate degradation protein      | 0.25 | <b>4.07</b> |
| 2778358 | YpJF-YfjZ toxin-antitoxin system       | <i>ypjF</i>   | > | <i>ypjA</i>   | < | <i>pinH</i>    | predicted invertase fragment           | 0.25 | <b>4.07</b> |
| 587436  | predicted protein                      | <i>ybcH</i>   | < | <i>nfrA</i>   | < | <i>nfrB</i>    | bacteriophage N4 receptor, inner       | 0.25 | <b>4.07</b> |
| 611372  | phosphotransferase                     | <i>entD</i>   | < | <i>fepA</i>   | > | <i>fes</i>     | enterochelin esterase                  | 0.25 | <b>4.05</b> |
| 589634  | predicted protein                      | <i>ybcH</i>   | < | <i>nfrA</i>   | < | <i>nfrB</i>    | bacteriophage N4 receptor, inner       | 0.25 | <b>4.04</b> |
| 380330  | acyl transferase (pseudogene)          | <i>yaiX</i>   | < |               | > | <i>insCD-1</i> | IS2 element transposase InsA/E         | 0.25 | <b>4.04</b> |
| 3361366 | periplasmic chaperone protein          | <i>yhcA</i>   | > | <i>yhcD</i>   | > | <i>yhcE_1</i>  | predicted protein, N-terminal fragment | 0.25 | <b>4.02</b> |
| 272070  | induced by insertion of IS30 element   | <i>insO-1</i> | > |               | > | <i>ykfC</i>    | CP4-6 prophage; conserved protein      | 0.25 | <b>4.02</b> |
| 383568  | predicted glucosyltransferase          | <i>yaiP</i>   | < | <i>yaiS</i>   | > | <i>tauA</i>    | TauA                                   | 0.25 | <b>4.01</b> |
| 276360  | MmuP APC transporter                   | <i>mmuP</i>   | > | <i>mmuM</i>   | < | <i>afuC</i>    | CP4-6 prophage; predicted ferritin     | 0.25 | <b>4.01</b> |
| 1201756 | CP4-14 prophage; predicted protein     | <i>ymfJ</i>   | < | <i>ymfK</i>   | > | <i>ymfT</i>    | CP4-14 prophage; predicted DNA-binding | 0.25 | <b>4.00</b> |
| 2754968 |                                        | <i>ssrA</i>   | > | <i>intA</i>   | < | <i>yfjH</i>    | CP4-57 prophage; predicted protein     | 0.25 | <b>4.00</b> |
| 804848  | YbhI DASS Transporter                  | <i>ybhI</i>   | > | <i>ybhJ</i>   | < | <i>ybhC</i>    | outer membrane lipoprotein             | 0.25 | <b>4.00</b> |
| 1071042 | predicted aminoacylate hydrolase       | <i>rutD</i>   | < | <i>rutC</i>   | < | <i>rutB</i>    | peroxyureidoacrylate / ureidoacrylate  | 0.25 | <b>3.99</b> |
| 1454070 | phenylacetyl-CoA epoxidase subunit     | <i>paaC</i>   | > | <i>paaD</i>   | > | <i>paaE</i>    | predicted ring 1,2-phenylacetyl-CoA    | 0.25 | <b>3.99</b> |
| 285854  | CP4-57 prophage; predicted dehydratase | <i>yagF</i>   | > | <i>yagG</i>   | > | <i>yagH</i>    | putative $\beta$ -xylosidase           | 0.25 | <b>3.98</b> |
| 1294134 | thymine kinase/deoxyuridine kinase     | <i>tdk</i>    | > | <i>yhcG_2</i> | < | <i>yhcG_1</i>  | predicted protein, N-terminal fragment | 0.25 | <b>3.98</b> |
| 2075060 | CP4-44 prophage; predicted protein     | <i>yeeT</i>   | > |               | > | <i>yeeU</i>    | CP4-44 prophage; antitoxin of toxin    | 0.25 | <b>3.98</b> |
| 586868  | EnvY transcriptional activator         | <i>envY</i>   | < | <i>ybcH</i>   | < | <i>nfrA</i>    | bacteriophage N4 receptor, outer       | 0.25 | <b>3.96</b> |

Chip-chip assay was performed for *E. coli* K-12 wild-type and its *rpoZ*-defective mutant strains. After tiling array analysis, the level of RNAP binding was compared between two strains. The ratio of binding levels between RpoZ-defective RNAP and wild-type RNAP was calculated for the entire probe along the genome, and is aligned in the decreasing order in the *rpoZ* column (shown in bold). Top 30 sites of increased distribution of the RpoZ-defective RNAP are described in Table 1.
