# Supplementary material for: Altered Distribution of RNA Polymerase Lacking the Omega Subunit within the Prophages along the Escherichia coli K-12 Genome
Source: PubMed Central journal article supplement (PMC5811629; doi:10.1128/msystems.00172-17), 2018-02-13
Supplement: sys001182181st3.pdf [file sys001182181st3.pdf]

**Supplemental Table S3**  
**Decreased level of distribution of the *rpoZ* mutant RNAP**

| Position | Function                          | Left          | D | RNAP site   | D | Right          | Function                           | WT   | <i>rpoZ</i> |
|----------|-----------------------------------|---------------|---|-------------|---|----------------|------------------------------------|------|-------------|
| 293446   | prophage; DNA-binding protein     | <i>yagL</i>   | < | <i>yagM</i> | < | <i>yagN</i>    | CP4-6 prophage; predicted pro      | 37.2 | <b>0.03</b> |
| 2558866  | prophage; predicted integrase     | <i>intZ</i>   | > | <i>yffL</i> | > | <i>yffM</i>    | CPZ-55 prophage; predicted pr      | 32.5 | <b>0.03</b> |
| 293168   | prophage; DNA-binding protein     | <i>yagL</i>   | < |             | < | <i>yagM</i>    | CP4-6 prophage; predicted pro      | 21.5 | <b>0.05</b> |
| 2103636  | predicted acyl transferase        | <i>wbbJ</i>   | < | <i>wbbI</i> | < | <i>rfc</i>     | O-antigen polymerase               | 20.7 | <b>0.05</b> |
| 279962   | 6 prophage; conserved protein     | <i>yagB</i>   | < |             | < | <i>yagA</i>    | CP4-6 prophage; predicted DN       | 19.7 | <b>0.05</b> |
| 1687138  | fumarase A monomer                | <i>fumA</i>   | < | <i>manA</i> | > | <i>ydgA</i>    | conserved protein                  | 18.6 | <b>0.05</b> |
| 296336   | age; predicted phage integrase    | <i>intF</i>   | < |             | < | <i>yagP</i>    | predicted transcriptional regulat  | 17.0 | <b>0.06</b> |
| 284632   | ophage; predicted dehydratase     | <i>yagF</i>   | > |             | > | <i>yagG</i>    | YagG GPH Transporter               | 16.6 | <b>0.06</b> |
| 278132   | component of ABC superfamily      | <i>afuC</i>   | < | <i>afuB</i> | < | <i>insAB-2</i> | InsAB' transposase                 | 15.9 | <b>0.06</b> |
| 2298346  | ferredoxin-type protein           | <i>napG</i>   | < | <i>napA</i> | < | <i>napD</i>    | signal peptide-binding chaperon    | 15.3 | <b>0.07</b> |
| 2106448  | UDP-galactopyranose mutase        | <i>glf</i>    | < | <i>rfbX</i> | < | <i>rfbC</i>    | dTDP-4-dehydrorhamnose 3,5-        | 15.2 | <b>0.07</b> |
| 2188970  | outer membrane usher protein      | <i>yehB</i>   | < |             | < | <i>yehC</i>    | putative fimbrial chaperone        | 14.7 | <b>0.07</b> |
| 3334932  | binding transcriptional regulator | <i>yrbA</i>   | < |             | < | <i>mIaB</i>    | MlaB                               | 14.0 | <b>0.07</b> |
| 1201330  | e14 prophage; predicted protein   | <i>ymlJ</i>   | < |             | < | <i>ymlK</i>    | e14 prophage; predicted repres     | 13.6 | <b>0.07</b> |
| 3192540  | putative membrane protein         | <i>yqIK</i>   | > |             | < | <i>sibD</i>    | SibD small RNA                     | 12.2 | <b>0.08</b> |
| 4620444  | DeoD                              | <i>deoD</i>   | > | <i>yjiJ</i> | < | <i>lplA</i>    | lipoyl-protein ligase A            | 12.1 | <b>0.08</b> |
| 1429566  | redicted protein, C-ter fragment  | <i>lomR_2</i> | > | <i>stfR</i> | > | <i>tfaR</i>    | Rac prophage; predicted tail fib   | 12.1 | <b>0.08</b> |
| 4200248  | zinc homeostasis protein          | <i>zraP</i>   | < | <i>zraS</i> | > | <i>zraR</i>    | ZraR transcriptional activator     | 12.1 | <b>0.08</b> |
| 2784038  | <i>Phantom Gen</i>                |               | < |             | > | <i>ygaQ_1</i>  | predicted protein                  | 11.8 | <b>0.08</b> |
| 279646   | predicted IS protein              | <i>ykgN</i>   | < | <i>yagB</i> | < | <i>yagA</i>    | CP4-6 prophage; predicted DN       | 11.8 | <b>0.08</b> |
| 279738   | predicted IS protein              | <i>ykgN</i>   | < | <i>yagB</i> | < | <i>yagA</i>    | CP4-6 prophage; predicted DN       | 11.5 | <b>0.09</b> |
| 1544666  | predicted lipoprotein             | <i>yddL</i>   | < | <i>yddG</i> | > | <i>fdnG</i>    | formate dehydrogenase N, &alp      | 11.4 | <b>0.09</b> |
| 2558272  | prophage; predicted integrase     | <i>intZ</i>   | > |             | > | <i>yffL</i>    | CPZ-55 prophage; predicted pr      | 11.2 | <b>0.09</b> |
| 2106534  | UDP-galactopyranose mutase        | <i>glf</i>    | < | <i>rfbX</i> | < | <i>rfbC</i>    | dTDP-4-dehydrorhamnose 3,5-        | 11.2 | <b>0.09</b> |
| 1428072  | redicted protein, C-ter fragment  | <i>lomR_2</i> | > | <i>stfR</i> | > | <i>tfaR</i>    | Rac prophage; predicted tail fib   | 10.8 | <b>0.09</b> |
| 3678430  | 2-keto-3-deoxygluconokinase       | <i>kdgK</i>   | > |             | < | <i>yhjJ</i>    | predicted zinc-dependent peptid    | 10.7 | <b>0.09</b> |
| 4473768  | toxin-antitoxin biofilm protein   | <i>tabA</i>   | > | <i>yjgL</i> | < | <i>argI</i>    | ArgI                               | 10.7 | <b>0.09</b> |
| 3803272  | aride core biosynthesis protein   | <i>rfaS</i>   | < | <i>waaP</i> | < | <i>waaG</i>    | lipopolysaccharide glucosyltran    | 10.5 | <b>0.09</b> |
| 294058   | 4-6 prophage; predicted protein   | <i>yagM</i>   | < |             | < | <i>yagN</i>    | CP4-6 prophage; predicted pro      | 10.4 | <b>0.10</b> |
| 2765968  | 57 prophage; predicted protein    | <i>yfjO</i>   | > | <i>yfjP</i> | > | <i>yfjQ</i>    | CP4-57 prophage; predicted pr      | 10.3 | <b>0.10</b> |
| 3467430  | rioferritin-associated ferredoxin | <i>bfd</i>    | < | <i>chiA</i> | < | <i>tufA</i>    | elongation factor Tu               | 10.2 | <b>0.10</b> |
| 1311170  | redicted inner membrane protein   | <i>yciB</i>   | < | <i>yciC</i> | > | <i>ompW</i>    | OmpW, outer membrane protei        | 10.2 | <b>0.10</b> |
| 1736466  | small membrane protein            | <i>ynhF</i>   | < | <i>purR</i> | < | <i>ydhB</i>    | protein with similarity to transcr | 10.1 | <b>0.10</b> |
| 293538   | prophage; DNA-binding protein     | <i>yagL</i>   | < | <i>yagM</i> | < | <i>yagN</i>    | CP4-6 prophage; predicted pro      | 9.9  | <b>0.10</b> |
| 3802572  | ide-1,6-D-galactosyltransferase   | <i>waaB</i>   | < | <i>rfaS</i> | < | <i>waaP</i>    | lipopolysaccharide core heptos     | 9.8  | <b>0.10</b> |
| 288440   | inding transcriptional regulator  | <i>yagI</i>   | < |             | < | <i>argF</i>    | ArgF                               | 9.8  | <b>0.10</b> |
| 293372   | prophage; DNA-binding protein     | <i>yagL</i>   | < | <i>yagM</i> | < | <i>yagN</i>    | CP4-6 prophage; predicted pro      | 9.6  | <b>0.10</b> |
| 277762   | omocysteine methyltransferase     | <i>mmuM</i>   | > | <i>afuC</i> | < | <i>afuB</i>    | AfuB                               | 9.5  | <b>0.11</b> |
| 294942   | 4-6 prophage; predicted protein   | <i>yagN</i>   | < |             | < | <i>intF</i>    | CP4-6 prophage; predicted pha      | 9.2  | <b>0.11</b> |
| 2104144  | 1,6-galactofuranosyltransferase   | <i>wbbI</i>   | < | <i>rfc</i>  | < | <i>glf</i>     | UDP-galactopyranose mutase         | 9.2  | <b>0.11</b> |
| 284570   | ophage; predicted dehydratase     | <i>yagF</i>   | > |             | > | <i>yagG</i>    | YagG GPH Transporter               | 8.6  | <b>0.12</b> |
| 2989166  | redicted protein                  | <i>ygeF</i>   | > |             | > | <i>ygeG</i>    | predicted chaperone                | 8.6  | <b>0.12</b> |
| 2106658  | UDP-galactopyranose mutase        | <i>glf</i>    | < | <i>rfbX</i> | < | <i>rfbC</i>    | dTDP-4-dehydrorhamnose 3,5-        | 8.6  | <b>0.12</b> |
| 293230   | prophage; DNA-binding protein     | <i>yagL</i>   | < | <i>yagM</i> | < | <i>yagN</i>    | CP4-6 prophage; predicted pro      | 8.5  | <b>0.12</b> |
| 277970   | omocysteine methyltransferase     | <i>mmuM</i>   | > | <i>afuC</i> | < | <i>afuB</i>    | AfuB                               | 8.5  | <b>0.12</b> |
| 3798032  | V; probably hexose transferase    | <i>waaK</i>   | < | <i>rfaZ</i> | < | <i>waaY</i>    | lipopolysaccharide core heptos     | 8.4  | <b>0.12</b> |
| 2993554  | redicted protein                  | <i>ygeL</i>   | < | <i>ygeM</i> | < | <i>ygeN</i>    | predicted protein                  | 8.3  | <b>0.12</b> |
| 296170   | 4-6 prophage; predicted protein   | <i>yagN</i>   | < | <i>intF</i> | < | <i>yagP</i>    | predicted transcriptional regulat  | 8.1  | <b>0.12</b> |
| 676832   | redicted protein                  | <i>ybeR</i>   | > | <i>djIB</i> | < | <i>ybeT</i>    | conserved outer membrane pro       | 7.9  | <b>0.13</b> |
| 4429942  | alanine/glycine APC transporter   | <i>cycA</i>   | > | <i>ytfE</i> | < | <i>ytfF</i>    | inner membrane protein             | 7.9  | <b>0.13</b> |
| 546150   | ureidoglycolate dehydrogenase     | <i>allD</i>   | < | <i>fdrA</i> | > | <i>ylbE_1</i>  | predicted protein, N-ter fragmen   | 7.9  | <b>0.13</b> |
| 280064   | 6 prophage; conserved protein     | <i>yagB</i>   | < |             | < | <i>yagA</i>    | CP4-6 prophage; predicted DN       | 7.9  | <b>0.13</b> |
| 294834   | 4-6 prophage; predicted protein   | <i>yagN</i>   | < |             | < | <i>intF</i>    | CP4-6 prophage; predicted pha      | 7.8  | <b>0.13</b> |
| 3800232  | alpha-1,2-glucosyltransferase     | <i>waaJ</i>   | < | <i>waal</i> | < | <i>waaB</i>    | UDP-D-galactose:(glucosyl)lipo     | 7.7  | <b>0.13</b> |
| 293040   | 6 prophage; conserved protein     | <i>yagK</i>   | < | <i>yagL</i> | < | <i>yagM</i>    | CP4-6 prophage; predicted pro      | 7.7  | <b>0.13</b> |
| 2562360  | 55 prophage; predicted protein    | <i>yffQ</i>   | > | <i>yffR</i> | > | <i>yffS</i>    | CPZ-55 prophage; predicted pr      | 7.7  | <b>0.13</b> |
| 1199836  | phage exclusion; e14 prophage     | <i>lit</i>    | > | <i>intE</i> | < | <i>xisE</i>    | e14 prophage; predicted excisio    | 7.6  | <b>0.13</b> |
| 3796640  | O-antigen ligase                  | <i>rfaL</i>   | > | <i>waaK</i> | < | <i>rfaZ</i>    | protein involved in KdoIII attach  | 7.5  | <b>0.13</b> |
| 2101934  | ynthesis protein, N-ter fragment  | <i>wbbL_1</i> | < | <i>wbbK</i> | < | <i>wbbJ</i>    | predicted acyl transferase         | 7.4  | <b>0.13</b> |

|         |                                   |               |   |             |   |               |                                   |     |             |
|---------|-----------------------------------|---------------|---|-------------|---|---------------|-----------------------------------|-----|-------------|
| 294432  | 4-6 prophage; predicted protein   | <i>yagM</i>   | < | <i>yagN</i> | < | <i>intF</i>   | CP4-6 prophage; predicted pha     | 7.4 | <b>0.14</b> |
| 291460  | 4-6 prophage; predicted protein   | <i>yagJ</i>   | > |             | < | <i>yagK</i>   | CP4-6 prophage; conserved pro     | 7.4 | <b>0.14</b> |
| 2104264 | 1,6-galactofuranosyltransferase   | <i>wbbl</i>   | < | <i>rfc</i>  | < | <i>glf</i>    | UDP-galactopyranose mutase        | 7.3 | <b>0.14</b> |
| 1596458 | predicted lipoprotein             | <i>ydeK</i>   | < |             | < | <i>lsrK</i>   | autoinducer-2 kinase              | 7.3 | <b>0.14</b> |
| 294332  | 4-6 prophage; predicted protein   | <i>yagM</i>   | < |             | < | <i>yagN</i>   | CP4-6 prophage; predicted pro     | 7.2 | <b>0.14</b> |
| 576232  | 1 protein; locus of qsr prophage  | <i>nmpC</i>   | < |             | > | <i>essD</i>   | DLP12 prophage; predicted pha     | 7.1 | <b>0.14</b> |
| 3802172 | de-1,6-D-galactosyltransferase    | <i>waaB</i>   | < |             | < | <i>rfaS</i>   | lipopolysaccharide core biosynt   | 7.1 | <b>0.14</b> |
| 1639072 | phage; predicted S lysis protein  | <i>essQ</i>   | < |             | < | <i>cspB</i>   | Qin prophage; cold shock prote    | 7.0 | <b>0.14</b> |
| 2767872 | 57 prophage; predicted protein    | <i>yfjQ</i>   | > | <i>yfjR</i> | > | <i>ypjK</i>   | CP4-57 prophage; predicted inr    | 7.0 | <b>0.14</b> |
| 2467506 | actoprenyl glucosyl transferase   | <i>yfdH</i>   | > | <i>yfdI</i> | > | <i>tfaS</i>   | CPS-53 (KpLE1) prophage; tail     | 7.0 | <b>0.14</b> |
| 4444030 | outer membrane protein            | <i>ytfM</i>   | > | <i>ytfN</i> | > | <i>ytfP</i>   | conserved protein                 | 7.0 | <b>0.14</b> |
| 4091072 | FrvA                              | <i>frvA</i>   | < |             | < | <i>rhaM</i>   | L-rhamnose mutarotase             | 7.0 | <b>0.14</b> |
| 4620636 | DeoD                              | <i>deoD</i>   | > | <i>yjiJ</i> | < | <i>lplA</i>   | lipoyl-protein ligase A           | 6.9 | <b>0.14</b> |
| 292530  | 6 prophage; conserved protein     | <i>yagK</i>   | < | <i>yagL</i> | < | <i>yagM</i>   | CP4-6 prophage; predicted pro     | 6.9 | <b>0.15</b> |
| 287836  | putative &beta;-xylosidase        | <i>yagH</i>   | > | <i>yagI</i> | < | <i>argF</i>   | ArgF                              | 6.9 | <b>0.15</b> |
| 2382656 | deubiquitinase                    | <i>elaD</i>   | > | <i>yfbK</i> | > | <i>yfbL</i>   | predicted peptidase               | 6.9 | <b>0.15</b> |
| 1637130 | in prophage; cold shock protein   | <i>cspi</i>   | < | <i>ydfP</i> | < | <i>ydfQ</i>   | Qin prophage; predicted lysozy    | 6.8 | <b>0.15</b> |
| 284342  | phage; predicted lyase/synthase   | <i>yagE</i>   | > | <i>yagF</i> | > | <i>yagG</i>   | YagG GPH Transporter              | 6.8 | <b>0.15</b> |
| 4093968 | -phosphate aldolase monomer       | <i>rhaD</i>   | < | <i>rhaA</i> | < | <i>rhaB</i>   | L-rhamnulose kinase               | 6.8 | <b>0.15</b> |
| 2556732 | ammonia-lyase, &alpha; subunit    | <i>eutB</i>   | < |             | > | <i>intZ</i>   | CPZ-55 prophage; predicted int    | 6.8 | <b>0.15</b> |
| 3800158 | &alpha;-1,2-glucosyltransferase   | <i>waaJ</i>   | < | <i>waal</i> | < | <i>waaB</i>   | UDP-D-galactose:(glucosyl)lipo    | 6.7 | <b>0.15</b> |
| 4568572 | predicted transposase             | <i>yjiQ</i>   | > | <i>yjiR</i> | > | <i>yjiS</i>   | conserved protein                 | 6.7 | <b>0.15</b> |
| 2993746 | predicted protein                 | <i>ygeM</i>   | < |             | < | <i>ygeN</i>   | predicted protein                 | 6.7 | <b>0.15</b> |
| 2763154 | 57 prophage; predicted protein    | <i>yfjL</i>   | < |             | < | <i>yfjM</i>   | CP4-57 prophage; predicted pr     | 6.7 | <b>0.15</b> |
| 2185930 | predicted protein                 | <i>yohN</i>   | > | <i>yehA</i> | < | <i>yehB</i>   | putative outer membrane usher     | 6.6 | <b>0.15</b> |
| 284448  | phage; predicted dehydratase      | <i>yagF</i>   | > |             | > | <i>yagG</i>   | YagG GPH Transporter              | 6.6 | <b>0.15</b> |
| 2472336 | E1) prophage; predicted protein   | <i>yfdP</i>   | > | <i>yfdQ</i> | > | <i>yfdR</i>   | CPS-53 (KpLE1) prophage; ded      | 6.6 | <b>0.15</b> |
| 1644936 | Qin prophage; predicted protein   | <i>flxA</i>   | > |             | < | <i>ydfW</i>   | Qin prophage; predicted proteir   | 6.5 | <b>0.15</b> |
| 2190388 | ted fimbrial-like adhesin protein | <i>yehD</i>   | < |             | < | <i>yehE</i>   | predicted protein                 | 6.5 | <b>0.15</b> |
| 3095868 |                                   | <i>rdgB</i>   | > | <i>yggW</i> | < | <i>yggM</i>   | conserved protein                 | 6.4 | <b>0.16</b> |
| 2464466 | tRNA<SUP>argW</SUP>               | <i>argW</i>   | > |             | > | <i>intS</i>   | CPS-53 (KpLE1) prophage; pro      | 6.4 | <b>0.16</b> |
| 2558668 | 5 prophage; predicted integrase   | <i>intZ</i>   | > | <i>yffL</i> | > | <i>yffM</i>   | CPZ-55 prophage; predicted pr     | 6.4 | <b>0.16</b> |
| 1647062 | Qin prophage; predicted protein   | <i>rzpQ</i>   | > |             | > | <i>dicF</i>   | Qin prophage; DicF antisense F    | 6.3 | <b>0.16</b> |
| 575258  |                                   | <i>insH-2</i> | < | <i>nmpC</i> | > | <i>essD</i>   | DLP12 prophage; predicted pha     | 6.3 | <b>0.16</b> |
| 2559738 | 55 prophage; predicted protein    | <i>yffM</i>   | > | <i>yffN</i> | > | <i>yffO</i>   | CPZ-55 prophage; predicted pr     | 6.3 | <b>0.16</b> |
| 4570170 | conserved protein                 | <i>yjiS</i>   | > |             | > | <i>yjiT</i>   | conserved protein                 | 6.2 | <b>0.16</b> |
| 295350  | 4-6 prophage; predicted protein   | <i>yagN</i>   | < | <i>intF</i> | < | <i>yagP</i>   | predicted transcriptional regulat | 6.2 | <b>0.16</b> |
| 4572350 | conserved protein                 | <i>yjiT</i>   | > | <i>yjiV</i> | < | <i>mcrC</i>   | MrcC subunit of 5-methylcytosin   | 6.2 | <b>0.16</b> |
| 3359930 | tamate synthase, small subunit    | <i>gltD</i>   | > | <i>gltF</i> | > | <i>yhxA</i>   | predicted periplasmic chaperon    | 6.1 | <b>0.16</b> |
| 127764  | droilipoamide acetyltransferase   | <i>aceF</i>   | > |             | > | <i>lpd</i>    | E3 monomer                        | 6.1 | <b>0.16</b> |
| 2882562 | Cascade subunit A                 | <i>casA</i>   | < |             | < | <i>cas3</i>   | predicted fused HD nuclease a     | 6.1 | <b>0.17</b> |
| 2779238 | ypjF-YfjZ toxin-antitoxin system  | <i>ypjF</i>   | > | <i>ypjA</i> | < | <i>pinH</i>   | predicted invertase fragment      | 6.0 | <b>0.17</b> |
| 4089562 | frv operon protein                | <i>frvX</i>   | < | <i>frvB</i> | < | <i>frvA</i>   | FrvA                              | 6.0 | <b>0.17</b> |
| 2601070 | hydrogenase 4, component A        | <i>hyfA</i>   | > | <i>hyfB</i> | > | <i>hyfC</i>   | hydrogenase 4, component C        | 6.0 | <b>0.17</b> |
| 1463152 | peptide repeat acetyltransferase  | <i>paaY</i>   | > |             | < | <i>ynbG</i>   | small protein                     | 5.9 | <b>0.17</b> |
| 3801168 | &alpha;-1,3-glucosyltransferase   | <i>waal</i>   | < | <i>waaB</i> | < | <i>rfaS</i>   | lipopolysaccharide core biosynt   | 5.8 | <b>0.17</b> |
| 294172  | 4-6 prophage; predicted protein   | <i>yagM</i>   | < |             | < | <i>yagN</i>   | CP4-6 prophage; predicted pro     | 5.7 | <b>0.17</b> |
| 4435856 | ),5'-bisphosphate nucleotidase    | <i>cysQ</i>   | > | <i>ytfI</i> | < | <i>ytfJ</i>   | conserved protein                 | 5.7 | <b>0.18</b> |
| 4570068 | conserved protein                 | <i>yjiS</i>   | > |             | > | <i>yjiT</i>   | conserved protein                 | 5.7 | <b>0.18</b> |
| 2070240 | IsrC small RNA                    | <i>isrC</i>   | > | <i>flu</i>  | > | <i>yeeR</i>   | CP4-44 prophage; predicted me     | 5.6 | <b>0.18</b> |
| 293632  | prophage; DNA-binding protein     | <i>yagL</i>   | < | <i>yagM</i> | < | <i>yagN</i>   | CP4-6 prophage; predicted pro     | 5.6 | <b>0.18</b> |
| 4313832 | -CoA N-acyltransferase domain     | <i>phnO</i>   | < | <i>phnN</i> | < | <i>phnM</i>   | ATP-binding component of pho      | 5.6 | <b>0.18</b> |
| 2103554 | predicted acyl transferase        | <i>wbbJ</i>   | < | <i>wbbl</i> | < | <i>rfc</i>    | O-antigen polymerase              | 5.6 | <b>0.18</b> |
| 789330  | galactokinase                     | <i>galK</i>   | < | <i>galT</i> | < | <i>galE</i>   | UDP-glucose 4-epimerase mon       | 5.5 | <b>0.18</b> |
| 2031954 | of OmpA and OmpC expression       | <i>rseX</i>   | > |             | > | <i>yedS_1</i> | predicted protein, N-ter fragmen  | 5.5 | <b>0.18</b> |
| 2993634 | predicted protein                 | <i>ygeL</i>   | < | <i>ygeM</i> | < | <i>ygeN</i>   | predicted protein                 | 5.5 | <b>0.18</b> |
| 2879966 | Cascade subunit D                 | <i>casD</i>   | < | <i>casC</i> | < | <i>casB</i>   | Cascade subunit B                 | 5.5 | <b>0.18</b> |
| 2108132 | polysaccharide PST transporter    | <i>rfbX</i>   | < | <i>rfbC</i> | < | <i>rfbA</i>   | dTDP-glucose pyrophosphoryla      | 5.4 | <b>0.18</b> |
| 292040  | 4-6 prophage; predicted protein   | <i>yagJ</i>   | > | <i>yagK</i> | < | <i>yagL</i>   | CP4-6 prophage; DNA-binding       | 5.4 | <b>0.18</b> |
| 2882356 | Cascade subunit A                 | <i>casA</i>   | < |             | < | <i>cas3</i>   | predicted fused HD nuclease a     | 5.4 | <b>0.19</b> |
| 2185770 | predicted protein                 | <i>yohN</i>   | > | <i>yehA</i> | < | <i>yehB</i>   | putative outer membrane usher     | 5.4 | <b>0.19</b> |
| 1588350 | predicted protein                 | <i>ydeT</i>   | < |             | < | <i>yneL</i>   | predicted transcriptional regulat | 5.4 | <b>0.19</b> |

|         |                                   |               |   |               |   |             |                                   |     |             |
|---------|-----------------------------------|---------------|---|---------------|---|-------------|-----------------------------------|-----|-------------|
| 3800334 | alpha;-1,2-glucosyltransferase    | <i>waaJ</i>   | < | <i>waal</i>   | < | <i>waaB</i> | UDP-D-galactose:(glucosyl)lipo    | 5.4 | <b>0.19</b> |
| 2386672 | predicted protein                 | <i>yfbN</i>   | < | <i>yfbO</i>   | > | <i>yfbP</i> | predicted protein                 | 5.4 | <b>0.19</b> |
| 2885168 | Cascade subunit A                 | <i>casA</i>   | < | <i>cas3</i>   | > | <i>sokX</i> | SokX                              | 5.3 | <b>0.19</b> |
| 3805730 | accharide glucosyltransferase I   | <i>waaG</i>   | < | <i>waaQ</i>   | > | <i>waaA</i> | KDO transferase                   | 5.3 | <b>0.19</b> |
| 2234632 | imidine dehydrogenase subunit     | <i>yeiA</i>   | > |               | < | <i>mgIC</i> | MgIC                              | 5.2 | <b>0.19</b> |
| 2755760 | CP4-57 prophage; integrase        | <i>intA</i>   | > | <i>yfjH</i>   | > | <i>alpA</i> | AlpA transcriptional activator; C | 5.2 | <b>0.19</b> |
| 1470046 | transposase of IS30               | <i>insI-2</i> | > | <i>ydbA_2</i> | > | <i>ydbC</i> | predicted oxidoreductase, NAD     | 5.2 | <b>0.19</b> |
| 2992670 | peptidoglycan-binding enzyme      | <i>pbl</i>    | > | <i>ygeK</i>   | < | <i>ygeL</i> | predicted protein                 | 5.2 | <b>0.19</b> |
| 1468846 | transposase of IS30               | <i>insI-2</i> | > | <i>ydbA_2</i> | > | <i>ydbC</i> | predicted oxidoreductase, NAD     | 5.2 | <b>0.19</b> |
| 296234  | 4-6 prophage; predicted protein   | <i>yagN</i>   | < | <i>intF</i>   | < | <i>yagP</i> | predicted transcriptional regulat | 5.2 | <b>0.19</b> |
| 636048  | conserved protein                 | <i>ybdN</i>   | < | <i>ybdO</i>   | < | <i>dsbG</i> | DsbG<SUB>reduced</SUB>            | 5.2 | <b>0.19</b> |
| 2765266 | CP4-57 prophage; RNase LS         | <i>rnlA</i>   | > | <i>yfjO</i>   | > | <i>yfjP</i> | CP4-57 prophage; predicted G      | 5.2 | <b>0.19</b> |
| 3416664 | ted outer membrane lipoprotein    | <i>yhdV</i>   | > |               | > | <i>yhdW</i> | YhdW                              | 5.2 | <b>0.19</b> |
| 1095368 | predicted protein                 | <i>ymdE</i>   | > | <i>ycdU</i>   | < | <i>serX</i> | tRNA<SUP>serX</SUP>               | 5.2 | <b>0.19</b> |
| 1643734 | be the repressor activity of RelB | <i>relE</i>   | < | <i>relB</i>   | > | <i>ydfV</i> | Qin prophage; predicted protei    | 5.1 | <b>0.19</b> |
| 1635936 | Qin prophage; predicted protein   | <i>gnsB</i>   | < |               | < | <i>ynfN</i> | Qin prophage; predicted protei    | 5.1 | <b>0.20</b> |
| 3796746 | O-antigen ligase                  | <i>rfaL</i>   | > | <i>waaK</i>   | < | <i>rfaZ</i> | protein involved in KdoIII attach | 5.1 | <b>0.20</b> |
| 2992436 | peptidoglycan-binding enzyme      | <i>pbl</i>    | > |               | < | <i>ygeK</i> | predicted DNA-binding transcrip   | 5.1 | <b>0.20</b> |
| 2765354 | 57 prophage; predicted protein    | <i>yfjO</i>   | > |               | > | <i>yfjP</i> | CP4-57 prophage; predicted G      | 5.1 | <b>0.20</b> |
| 238730  | C0067 small RNA                   | <i>C0067</i>  | > |               | < | <i>yafU</i> | predicted inner membrane prote    | 5.0 | <b>0.20</b> |
| 2387730 | predicted protein                 | <i>yfbO</i>   | > | <i>yfbP</i>   | < | <i>nuoN</i> | NADH:ubiquinone oxidoreducta      | 5.0 | <b>0.20</b> |
| 2988170 | small protein                     | <i>yqeL</i>   | < | <i>yqeK</i>   | > | <i>ygeF</i> | predicted protein                 | 5.0 | <b>0.20</b> |
| 927556  | alanyl-tRNA-protein transferase   | <i>aat</i>    | < | <i>cydC</i>   | < | <i>cydD</i> | CydD                              | 5.0 | <b>0.20</b> |
| 2102040 | ynthesis protein, N-ter fragment  | <i>wbbL_1</i> | < | <i>wbbK</i>   | < | <i>wbbJ</i> | predicted acyl transferase        | 5.0 | <b>0.20</b> |
| 3806064 | accharide glucosyltransferase I   | <i>waaG</i>   | < | <i>waaQ</i>   | > | <i>waaA</i> | KDO transferase                   | 4.9 | <b>0.20</b> |
| 2559956 | 55 prophage; predicted protein    | <i>yffM</i>   | > | <i>yffN</i>   | > | <i>yffO</i> | CPZ-55 prophage; predicted pr     | 4.9 | <b>0.20</b> |
| 3806372 | de core heptosyl transferase III  | <i>waaQ</i>   | < |               | > | <i>waaA</i> | KDO transferase                   | 4.9 | <b>0.20</b> |
| 2562046 | 55 prophage; predicted protein    | <i>yffQ</i>   | > | <i>yffR</i>   | > | <i>yffS</i> | CPZ-55 prophage; predicted pr     | 4.9 | <b>0.20</b> |
| 2189932 | putative fimbrial chaperone       | <i>yehC</i>   | < | <i>yehD</i>   | < | <i>yehE</i> | predicted protein                 | 4.9 | <b>0.20</b> |
| 2105234 | O-antigen polymerase              | <i>rfc</i>    | < |               | < | <i>glf</i>  | UDP-galactopyranose mutase        | 4.9 | <b>0.20</b> |
| 2988770 | predicted protein                 | <i>yqeK</i>   | < | <i>ygeF</i>   | > | <i>ygeG</i> | predicted chaperone               | 4.9 | <b>0.20</b> |
| 3036248 | RecJ                              | <i>recJ</i>   | < | <i>dsbC</i>   | < | <i>xerD</i> | site-specific recombinase         | 4.9 | <b>0.20</b> |
| 1471130 | transposase of IS30               | <i>insI-2</i> | > | <i>ydbA_2</i> | > | <i>ydbC</i> | predicted oxidoreductase, NAD     | 4.9 | <b>0.20</b> |
| 3700368 | YhjV STP transporter              | <i>yhjV</i>   | > | <i>dppF</i>   | < | <i>dppD</i> | DppD                              | 4.9 | <b>0.21</b> |
| 2559840 | 55 prophage; predicted protein    | <i>yffM</i>   | > | <i>yffN</i>   | > | <i>yffO</i> | CPZ-55 prophage; predicted pr     | 4.9 | <b>0.21</b> |
| 2106830 | UDP-galactopyranose mutase        | <i>glf</i>    | < | <i>rfbX</i>   | < | <i>rfbC</i> | dTDP-4-dehydroorhamnose 3,5-      | 4.8 | <b>0.21</b> |
| 582934  | 12 prophage; predicted protein    | <i>tfaX</i>   | > | <i>appY</i>   | < | <i>ompT</i> | outer membrane protease VII (c    | 4.8 | <b>0.21</b> |
| 1991670 | idylglycerophosphate synthase     | <i>pgsA</i>   | < | <i>uvrC</i>   | < | <i>uvrY</i> | UvrY transcriptional regulator    | 4.8 | <b>0.21</b> |
| 3360048 | periplasmic protein               | <i>glTF</i>   | > |               | > | <i>yhcA</i> | predicted periplasmic chaperon    | 4.8 | <b>0.21</b> |
| 238854  | C0067 small RNA                   | <i>C0067</i>  | > | <i>yafU</i>   | > | <i>yafF</i> | conserved protein                 | 4.8 | <b>0.21</b> |
| 2558970 | 55 prophage; predicted protein    | <i>yffL</i>   | > |               | > | <i>yffM</i> | CPZ-55 prophage; predicted pr     | 4.8 | <b>0.21</b> |
| 2838064 | AscG transcriptional repressor    | <i>ascG</i>   | < | <i>ascF</i>   | > | <i>ascB</i> | 6-phospho-&beta;-glucosidase;     | 4.8 | <b>0.21</b> |
| 2878270 | predicted integrase               | <i>cas1</i>   | < | <i>casE</i>   | < | <i>casD</i> | Cascade subunit D                 | 4.7 | <b>0.21</b> |
| 292656  | 6 prophage; conserved protein     | <i>yagK</i>   | < | <i>yagL</i>   | < | <i>yagM</i> | CP4-6 prophage; predicted pro     | 4.7 | <b>0.21</b> |
| 4057356 | GlnA                              | <i>glnA</i>   | < | <i>typA</i>   | > | <i>yihL</i> | YihL putative transcriptional reg | 4.7 | <b>0.21</b> |
| 2878936 | crRNA endonuclease                | <i>casE</i>   | < | <i>casD</i>   | < | <i>casC</i> | Cascade subunit C                 | 4.7 | <b>0.21</b> |
| 2988240 | small protein                     | <i>yqeL</i>   | < | <i>yqeK</i>   | > | <i>ygeF</i> | predicted protein                 | 4.6 | <b>0.22</b> |
| 291064  |                                   | <i>insA-3</i> | < | <i>yagJ</i>   | < | <i>yagK</i> | CP4-6 prophage; conserved pro     | 4.6 | <b>0.22</b> |
| 2406734 | hA transcriptional dual regulator | <i>lrhA</i>   | < | <i>yfbQ</i>   | > | <i>yfbR</i> | dCMP phosphohydrolase             | 4.6 | <b>0.22</b> |
| 2467692 | actoprenyl glucosyl transferase   | <i>yfdH</i>   | > | <i>yfdI</i>   | > | <i>tfaS</i> | CPS-53 (KpLE1) prophage; tail     | 4.6 | <b>0.22</b> |
| 1633262 | icted tail fibre assembly protein | <i>tfaQ</i>   | < | <i>ydfN</i>   | < | <i>nohA</i> | Qin prophage; predicted packag    | 4.6 | <b>0.22</b> |
| 2101034 |                                   | <i>insH-7</i> | < | <i>wbbL_1</i> | < | <i>wbbK</i> | predicted lipopolysaccharide bi   | 4.6 | <b>0.22</b> |
| 673772  | rare lipoprotein LptE             | <i>lptE</i>   | < | <i>leuS</i>   | > | <i>ybeL</i> | conserved protein                 | 4.6 | <b>0.22</b> |
| 2763338 | 57 prophage; predicted protein    | <i>yfjL</i>   | < |               | < | <i>yfjM</i> | CP4-57 prophage; predicted pr     | 4.6 | <b>0.22</b> |
| 2558062 | 5 prophage; predicted integrase   | <i>intZ</i>   | > |               | > | <i>yffL</i> | CPZ-55 prophage; predicted pr     | 4.6 | <b>0.22</b> |
| 4436036 | ),5'-bisphosphate nucleotidase    | <i>cysQ</i>   | > | <i>ytfI</i>   | < | <i>ytfJ</i> | conserved protein                 | 4.5 | <b>0.22</b> |
| 2103932 | predicted acyl transferase        | <i>wbbJ</i>   | < | <i>wbbI</i>   | < | <i>rfc</i>  | O-antigen polymerase              | 4.5 | <b>0.22</b> |
| 2101836 | ynthesis protein, N-ter fragment  | <i>wbbL_1</i> | < | <i>wbbK</i>   | < | <i>wbbJ</i> | predicted acyl transferase        | 4.5 | <b>0.22</b> |
| 292260  | 6 prophage; conserved protein     | <i>yagK</i>   | < |               | < | <i>yagL</i> | CP4-6 prophage; DNA-binding       | 4.5 | <b>0.22</b> |
| 2988054 | small protein                     | <i>yqeL</i>   | < | <i>yqeK</i>   | > | <i>ygeF</i> | predicted protein                 | 4.5 | <b>0.22</b> |
| 3801248 | alpha;-1,3-glucosyltransferase    | <i>waal</i>   | < | <i>waaB</i>   | < | <i>rfaS</i> | lipopolysaccharide core biosynt   | 4.5 | <b>0.22</b> |
| 3798254 | lysaccharide core biosynthesis    | <i>rfaZ</i>   | < |               | < | <i>waaY</i> | lipopolysaccharide core heptos    | 4.5 | <b>0.22</b> |

|         |                                              |             |   |               |   |             |                                            |     |             |
|---------|----------------------------------------------|-------------|---|---------------|---|-------------|--------------------------------------------|-----|-------------|
| 2252332 | rimidine nucleoside transporter              | <i>nupX</i> | < | <i>rihB</i>   | > | <i>yeiL</i> | YeiL transcriptional activator             | 4.5 | <b>0.22</b> |
| 2140654 | Dcd                                          | <i>dcd</i>  | < | <i>udk</i>    | > | <i>yegE</i> | predicted diguanylate cyclase              | 4.5 | <b>0.22</b> |
| 2385530 | predicted protein                            | <i>yfbM</i> | > |               | < | <i>yfbN</i> | predicted protein                          | 4.4 | <b>0.22</b> |
| 265132  | CP4-6 prophage; predicted protein            | <i>ykfF</i> | < | <i>ykfB</i>   | < | <i>yafY</i> | CP4-6 prophage; inner membrane             | 4.4 | <b>0.23</b> |
| 3805672 | disaccharide glucosyltransferase I           | <i>waaG</i> | < | <i>waaQ</i>   | > | <i>waaA</i> | KDO transferase                            | 4.4 | <b>0.23</b> |
| 2987942 | small protein                                | <i>yqeL</i> | < |               | < | <i>yqeK</i> | predicted protein                          | 4.4 | <b>0.23</b> |
| 798130  | 6-phosphofructose 1,6-bisphosphatase         | <i>ybhA</i> | < | <i>pgl</i>    | < | <i>ybhD</i> | predicted DNA-binding transcription factor | 4.4 | <b>0.23</b> |
| 280360  | CP4-6 prophage; conserved protein            | <i>yagB</i> | < | <i>yagA</i>   | > | <i>yagE</i> | CP4-6 prophage; predicted lysin            | 4.4 | <b>0.23</b> |
| 2069334 | predicted GTP-binding protein                | <i>yeeP</i> | > |               | > | <i>isrC</i> | IsrC small RNA                             | 4.4 | <b>0.23</b> |
| 1643558 | CP4-6 prophage; small toxic polypeptide      | <i>hokD</i> | < | <i>relE</i>   | < | <i>relB</i> | RelB Qin prophage; antitoxin of            | 4.4 | <b>0.23</b> |
| 2878344 | predicted integrase                          | <i>cas1</i> | < | <i>casE</i>   | < | <i>casD</i> | Cascade subunit D                          | 4.4 | <b>0.23</b> |
| 3800548 | UDP-galactose 4-epimerase                    | <i>waaJ</i> | < | <i>waal</i>   | < | <i>waaB</i> | UDP-D-galactose:(glucosyl)lipid            | 4.3 | <b>0.23</b> |
| 2987772 | predicted transcriptional regulator          | <i>yqeI</i> | > | <i>yqeJ</i>   | < | <i>yqeL</i> | small protein                              | 4.3 | <b>0.23</b> |
| 3803540 | lipopolysaccharide core biosynthesis protein | <i>rfaS</i> | < | <i>waaP</i>   | < | <i>waaG</i> | lipopolysaccharide glucosyltransferase     | 4.3 | <b>0.23</b> |
| 2107634 | polysaccharide PST transporter               | <i>rfbX</i> | < |               | < | <i>rfbC</i> | dTDP-4-dehydrorhamnose 3,5-epimerase       | 4.3 | <b>0.23</b> |
| 2385772 | predicted protein                            | <i>yfbM</i> | > | <i>yfbN</i>   | > | <i>yfbO</i> | predicted protein                          | 4.3 | <b>0.23</b> |
| 2763272 | CP4-57 prophage; predicted protein           | <i>yfjL</i> | < |               | < | <i>yfjM</i> | CP4-57 prophage; predicted protein         | 4.3 | <b>0.23</b> |
| 2755870 | CP4-57 prophage; integrase                   | <i>intA</i> | > | <i>yfjH</i>   | > | <i>alpA</i> | AlpA transcriptional activator; C          | 4.3 | <b>0.24</b> |
| 586152  | EnvY transcriptional activator               | <i>envY</i> | < |               | < | <i>ybcH</i> | predicted protein                          | 4.3 | <b>0.24</b> |
| 2107730 | polysaccharide PST transporter               | <i>rfbX</i> | < | <i>rfbC</i>   | < | <i>rfbA</i> | dTDP-glucose pyrophosphorylase             | 4.2 | <b>0.24</b> |
| 3800958 | UDP-galactose 4-epimerase                    | <i>waaJ</i> | < | <i>waal</i>   | < | <i>waaB</i> | UDP-D-galactose:(glucosyl)lipid            | 4.2 | <b>0.24</b> |
| 576360  | phage protein; locus of qsr prophage         | <i>nmpC</i> | < |               | > | <i>essD</i> | DLP12 prophage; predicted phage            | 4.2 | <b>0.24</b> |
| 273772  | CP4-6 prophage; conserved protein            | <i>ykfC</i> | > | <i>insH-1</i> | > | <i>mmuP</i> | MmuP APC transporter                       | 4.2 | <b>0.24</b> |
| 1646036 | transcriptional regulator for DicB           | <i>dicC</i> | < | <i>dicA</i>   | > | <i>ydfA</i> | Qin prophage; predicted protein            | 4.2 | <b>0.24</b> |
| 3803124 | lipopolysaccharide core biosynthesis protein | <i>rfaS</i> | < |               | < | <i>waaP</i> | lipopolysaccharide core heptose            | 4.2 | <b>0.24</b> |
| 1461572 | phenylacetate-CoA ligase                     | <i>paaK</i> | > |               | > | <i>paaX</i> | PaaX                                       | 4.2 | <b>0.24</b> |
| 4395832 | muramoyl-L-alanine amidase 2                 | <i>amiB</i> | > | <i>mutL</i>   | > | <i>miaA</i> | tRNA(i<sup>6</sup>A37) synthetase          | 4.2 | <b>0.24</b> |
| 1599036 | autoinducer-2 kinase                         | <i>lsrK</i> | < | <i>lsrR</i>   | > | <i>lsrA</i> | LsrA                                       | 4.2 | <b>0.24</b> |
| 1644664 | Qin prophage; predicted protein              | <i>ydfV</i> | > | <i>flxA</i>   | < | <i>ydfW</i> | Qin prophage; predicted protein            | 4.1 | <b>0.24</b> |
| 58658   | chaperone with DnaK                          | <i>djlA</i> | > | <i>yabP</i>   | > | <i>yabQ</i> | predicted protein                          | 4.1 | <b>0.24</b> |
| 1645350 | Qin prophage; predicted protein              | <i>ydfW</i> | < |               | < | <i>ydfX</i> | Qin prophage; predicted protein            | 4.1 | <b>0.24</b> |
| 3796534 | O-antigen ligase                             | <i>rfaL</i> | > | <i>waaK</i>   | < | <i>rfaZ</i> | protein involved in KdoIII attachment      | 4.1 | <b>0.24</b> |
| 3780254 | predicted rRNA methylase                     | <i>yibK</i> | > | <i>cysE</i>   | < | <i>gpsA</i> | GpsA                                       | 4.1 | <b>0.24</b> |
| 4570370 | conserved protein                            | <i>yjiS</i> | > |               | > | <i>yjiT</i> | conserved protein                          | 4.1 | <b>0.24</b> |
| 1633630 | predicted tail fibre assembly protein        | <i>tfaQ</i> | < | <i>ydfN</i>   | < | <i>nohA</i> | Qin prophage; predicted packaging          | 4.1 | <b>0.25</b> |
| 690530  | polipoprotein N-acyltransferase              | <i>Int</i>  | < | <i>ybeX</i>   | < | <i>ybeY</i> | conserved protein involved in trans        | 4.1 | <b>0.25</b> |
| 2092660 |                                              | <i>hisB</i> | > | <i>hisH</i>   | > | <i>hisA</i> | N-(5'-phospho-L-ribosyl)-formimidate       | 4.0 | <b>0.25</b> |
| 4476964 | phosphonuclease E inhibitor protein B        | <i>rraB</i> | > |               | > | <i>yjgM</i> | predicted acetyltransferase                | 4.0 | <b>0.25</b> |
| 2988370 | predicted protein                            | <i>yqeK</i> | < |               | > | <i>ygeF</i> | predicted protein                          | 4.0 | <b>0.25</b> |
| 2845070 | hydrogenase 3, large subunit                 | <i>hycE</i> | < | <i>hycD</i>   | < | <i>hycC</i> | hydrogenase 3, membrane subunit            | 4.0 | <b>0.25</b> |
| 3799872 | lipopolysaccharide core heptose (II) kinase  | <i>waaY</i> | < | <i>waaJ</i>   | < | <i>waal</i> | UDP-D-glucose:(glucosyl)LPS kinase         | 4.0 | <b>0.25</b> |
| 2763970 | CP4-57 prophage; predicted protein           | <i>yfjM</i> | < | <i>rmlA</i>   | > | <i>yfjO</i> | CP4-57 prophage; predicted protein         | 4.0 | <b>0.25</b> |
| 2387644 | predicted protein                            | <i>yfbO</i> | > | <i>yfbP</i>   | < | <i>nuoN</i> | NADH:ubiquinone oxidoreductase             | 4.0 | <b>0.25</b> |

Chip-chip assay was performed for *E. coli* K-12 wild-type and its *rpoZ*-defective mutant strains. After tiling array analysis, the level of RNAP binding was compared between two strains. The ratio between the binding of RpoZ-defective RNAP and that of wild-type RNAP was calculated for the entire probe along the genome. This value is aligned in the increasing order in the *rpoZ* column (shown in bold). Top 31 genes of low-level distribution of the RpoZ-defective RNAP are described in Table 2.
